# Supplementary material for: A Multicomponent Neuronal Response Encodes the Larval Decision to Pupariate upon Amino Acid Starvation
Source: J Neurosci. 2018 Nov 21;38(47):10202–19. doi: 10.1523/JNEUROSCI.1163-18.2018 (PMC6246885; doi:10.1523/JNEUROSCI.1163-18.2018)
Supplement: Figure 1-1 [file zns999181246so1.xlsx]

## Sheet: Figure1
h.	1.13898e-07		Two-tailed Student's t-test				VGN6341-GAL4>UAS-CsChrimson vs UAS-CsChrimson/+ (Day1)
	5.97771e-05		Two-tailed Student's t-test				VGN6341-GAL4>UAS-CsChrimson vs UAS-CsChrimson/+ (Day2)
i.	6.6811e-20		Two-tailed Student's t-test				VGN6341-GAL4>UAS-CsChrimson vs UAS-CsChrimson/+ (Percentage Adults)

## Sheet: Figure2
a.	ANOVA	DF	Sum of Squares	Mean Square	F Value	Prob>F					Level 1- UAS-dStim IR/+
	Model	5	43191.6	8638.31	652.221	0					Level 2-VGN6341-GAL>UAS-dStim IR
	Error	30	397.333	13.2444							Level 3-UAS-dOrai IR/+
	Total	35	43588.9								Level 4-VGN6341-GAL>UAS-dOrai IR
											Level 5-UAS-dOrai E180A/+
	Tukey Test	MeanDiff	SEM	q Value	Prob	Alpha	Sig	LCL	UCL		Level 6-VGN6341-GAL>UAS-dOrai E180A
	Level2 Level1	-70	2.10115	47.1147	0	0.1	1	-75.7216	-64.2784
	Level3 Level1	0.66667	2.10115	0.44871	0.99952	0.1	0	-5.0549	6.38824
	Level3 Level2	70.6667	2.10115	47.5635	0	0.1	1	64.9451	76.3882
	Level4 Level1	-64.6667	2.10115	43.525	0	0.1	1	-70.3882	-58.9451
	Level4 Level2	5.33333	2.10115	3.58969	0.14504	0.1	0	-0.38824	11.0549
	Level4 Level3	-65.3333	2.10115	43.9738	0	0.1	1	-71.0549	-59.6118
	Level5 Level1	-0.66667	2.10115	0.44871	0.99952	0.1	0	-6.38824	5.0549
	Level5 Level2	69.3333	2.10115	46.666	0	0.1	1	63.6118	75.0549
	Level5 Level3	-1.33333	2.10115	0.89742	0.98741	0.1	0	-7.0549	4.38824
	Level5 Level4	64	2.10115	43.0763	0	0.1	1	58.2784	69.7216
	Level6 Level1	-72.6667	2.10115	48.9096	0	0.1	1	-78.3882	-66.9451
	Level6 Level2	-2.66667	2.10115	1.79485	0.79895	0.1	0	-8.38824	3.0549
	Level6 Level3	-73.3333	2.10115	49.3583	0	0.1	1	-79.0549	-67.6118
	Level6 Level4	-8	2.10115	5.38454	0.00772	0.1	1	-13.7216	-2.27843
	Level6 Level5	-72	2.10115	48.4609	0	0.1	1	-77.7216	-66.2784
c.	ANOVA	DF	Sum of Squares	Mean Square	F Value	Prob>F					Level 1- VGN6341-GAL4>UAS-GCaMP6m (84±1 3rd instar Larvae)
	Model	6	5379.64	896.607	16.1339	2.51028e-08					Level 2-VGN6341-GAL4>UAS-GCaMP6m (84±1 3rd instar Larvae)-Mock withdrawal
	Error	31	1722.76	55.5728							Level 3-VGN6341-GAL4>UAS-GCaMP6m (68±1 2nd instar Larvae)
	Total	37	7102.4								Level 4-VGN6341-GAL4>UAS-GCaMP6m;UAS-IP3R IR
											Level 5-VGN6341-GAL4>UAS-GCaMP6m;UAS-dStim IR
	Tukeys Test	MeanDiff	SEM	q Value	Prob	Alpha	Sig	LCL	UCL		Level 6-VGN6341-GAL4>UAS-GCaMP6m; UAS-dOrai IR
	Level2 Level1	-30.3532	4.02601	10.6621	4.37613e-07	0.05	1	-43.0338	-17.6725		Level 7-VGN6341-GAL4>UAS-GCaMP6m; UAS-dmAChR IR
	Level3 Level1	-32.4475	4.56506	10.0519	1.173e-06	0.05	1	-46.826	-18.0689
	Level3 Level2	-2.0943	4.812	0.6155	0.9994	0.05	0	-17.2506	13.062
	Level4 Level1	-25.2973	4.24984	8.41814	2.68867e-05	0.05	1	-38.683	-11.9116
	Level4 Level2	5.05587	4.51406	1.58396	0.91705	0.05	0	-9.16202	19.2738
	Level4 Level3	7.15017	5.00078	2.02206	0.7818	0.05	0	-8.60074	22.9011
	Level5 Level1	-29.2121	4.24984	9.72087	2.05108e-06	0.05	1	-42.5978	-15.8264
	Level5 Level2	1.14104	4.51406	0.35748	0.99997	0.05	0	-13.0769	15.3589
	Level5 Level3	3.23534	5.00078	0.91495	0.9945	0.05	0	-12.5156	18.9862
	Level5 Level4	-3.91483	4.71478	1.17427	0.97976	0.05	0	-18.7649	10.9353
	Level6 Level1	-21.3403	4.24984	7.10138	0.000369661	0.05	1	-34.726	-7.95462
	Level6 Level2	9.01284	4.51406	2.82364	0.43679	0.05	0	-5.20505	23.2307
	Level6 Level3	11.1071	5.00078	3.14108	0.31372	0.05	0	-4.64377	26.858
	Level6 Level4	3.95697	4.71478	1.18691	0.97864	0.05	0	-10.8931	18.8071
	Level6 Level5	7.87179	4.71478	2.36117	0.64018	0.05	0	-6.9783	22.7219
	Level7 Level1	-30.2072	4.24984	10.052	1.17282e-06	0.05	1	-43.5929	-16.8215
	Level7 Level2	0.14596	4.51406	0.04573	1	0.05	0	-14.0719	14.3638
	Level7 Level3	2.24026	5.00078	0.63354	0.99929	0.05	0	-13.5107	17.9912
	Level7 Level4	-4.90991	4.71478	1.47274	0.93998	0.05	0	-19.76	9.94019
	Level7 Level5	-0.99508	4.71478	0.29848	0.99999	0.05	0	-15.8452	13.855
	Level7 Level6	-8.86688	4.71478	2.65965	0.5073	0.05	0	-23.717	5.98322
d.	ANOVA	DF	Sum of Squares	Mean Square	F Value	Prob>F					Level 1- VGN6341-GAL4>UAS-GCaMP6m (84±1 3rd instar Larvae)
	Model	6	41588800	6931460	9.25345	3.53355e-09					Level 2-VGN6341-GAL4>UAS-GCaMP6m (84±1 3rd instar Larvae)-Mock withdrawal
	Error	255	191012000	749068							Level 3-VGN6341-GAL4>UAS-GCaMP6m (68±1 2nd instar Larvae)
	Total	261	232601000								Level 4-VGN6341-GAL4>UAS-GCaMP6m;UAS-IP3R IR
											Level 5-VGN6341-GAL4>UAS-GCaMP6m;UAS-dStim IR
	Tukey Test	MeanDiff	SEM	q Value	Prob	Alpha	Sig	LCL	UCL		Level 6-VGN6341-GAL4>UAS-GCaMP6m; UAS-dOrai IR
	Level2 Level1	-802.605	181.748	6.2452	0.000296695	0.05	1	-1342.77	-262.44		Level 7-VGN6341-GAL4>UAS-GCaMP6m; UAS-dmAChR IR
	Level3 Level1	-753.476	246.389	4.32478	0.03913	0.05	1	-1485.76	-21.196
	Level3 Level2	49.1292	281.664	0.24667	1	0.05	0	-787.991	886.25
	Level4 Level1	-1007.93	199.426	7.14768	1.7019e-05	0.05	1	-1600.64	-415.229
	Level4 Level2	-205.328	241.657	1.20161	0.9793	0.05	0	-923.545	512.889
	Level4 Level3	-254.457	293.382	1.22658	0.97702	0.05	0	-1126.4	617.489
	Level5 Level1	-710.381	189.771	5.29392	0.00417	0.05	1	-1274.39	-146.373
	Level5 Level2	92.2242	233.752	0.55796	0.9997	0.05	0	-602.5	786.948
	Level5 Level3	43.0949	286.906	0.21242	1	0.05	0	-809.605	895.795
	Level5 Level4	297.552	247.747	1.69852	0.89332	0.05	0	-438.764	1033.87
	Level6 Level1	-715.396	154.43	6.55135	0.000116657	0.05	1	-1174.37	-256.423
	Level6 Level2	87.2095	206.097	0.59842	0.99955	0.05	0	-525.321	699.74
	Level6 Level3	38.0802	264.86	0.20333	1	0.05	0	-749.097	825.258
	Level6 Level4	292.538	221.843	1.86488	0.84275	0.05	0	-366.79	951.865
	Level6 Level5	-5.01467	213.205	0.03326	1	0.05	0	-638.67	628.641
	Level7 Level1	-875.113	207.057	5.97709	0.000650736	0.05	1	-1490.5	-259.73
	Level7 Level2	-72.5079	247.992	0.41349	0.99995	0.05	0	-809.551	664.536
	Level7 Level3	-121.637	298.621	0.57605	0.99964	0.05	0	-1009.16	765.881
	Level7 Level4	132.82	261.224	0.71906	0.99872	0.05	0	-643.551	909.192
	Level7 Level5	-164.732	253.929	0.91744	0.99504	0.05	0	-919.423	589.959
	Level7 Level6	-159.717	228.727	0.98753	0.99261	0.05	0	-839.504	520.07

## Sheet: Figure3
a.	ANOVA	DF	Sum of Squares	Mean Square	F Value	Prob>F					Level 1- VGN6341-GAL4>UAS-IP3R IR (PDD)
	Model	11	26962.4	2451.13	78.4501	0					Level 2-VGN6341-GAL4>UAS-IP3R IR (PDD + M)
	Error	60	1874.67	31.2444							Level 3-VGN6341-GAL4>UAS-IP3R IR (PDD + F)
	Total	71	28837.1								Level 4-VGN6341-GAL4>UAS-IP3R IR (PDD + T)
											Level 5-VGN6341-GAL4>UAS-IP3R IR (PDD + Y)
	Tukey Test	MeanDiff	SEM	q Value	Prob	Alpha	Sig	LCL	UCL		Level 6-VGN6341-GAL4>UAS-IP3R IR (PDD + W)
	Level2 Level1	42.6667	3.2272	18.6973	1.36017e-08	0.05	1	31.6938	53.6395		Level 7-VGN6341-GAL4>UAS-IP3R IR (PDD + K)
	Level3 Level1	46	3.2272	20.158	1.54306e-08	0.05	1	35.0272	56.9728		Level 8-VGN6341-GAL4>UAS-IP3R IR (PDD + H)
	Level3 Level2	3.33333	3.2272	1.46072	0.99623	0.05	0	-7.63949	14.3062		Level 9-VGN6341-GAL4>UAS-IP3R IR (PDD + R)
	Level4 Level1	41.3333	3.2272	18.113	1.28004e-08	0.05	1	30.3605	52.3062		Level 10-VGN6341-GAL4>UAS-IP3R IR (PDD + L)
	Level4 Level2	-1.33333	3.2272	0.58429	1	0.05	0	-12.3062	9.63949		Level 11-VGN6341-GAL4>UAS-IP3R IR (PDD + C)
	Level4 Level3	-4.66667	3.2272	2.04501	0.94889	0.05	0	-15.6395	6.30616		Level 12-VGN6341-GAL4>UAS-IP3R IR (PDD + V)
	Level5 Level1	45.3333	3.2272	19.8658	1.50849e-08	0.05	1	34.3605	56.3062
	Level5 Level2	2.66667	3.2272	1.16858	0.9995	0.05	0	-8.30616	13.6395
	Level5 Level3	-0.66667	3.2272	0.29214	1	0.05	0	-11.6395	10.3062
	Level5 Level4	4	3.2272	1.75287	0.98327	0.05	0	-6.97282	14.9728
	Level6 Level1	10.6667	3.2272	4.67431	0.06406	0.05	0	-0.30616	21.6395
	Level6 Level2	-32	3.2272	14.0229	3.37821e-08	0.05	1	-42.9728	-21.0272
	Level6 Level3	-35.3333	3.2272	15.4837	2.72317e-08	0.05	1	-46.3062	-24.3605
	Level6 Level4	-30.6667	3.2272	13.4387	3.73135e-08	0.05	1	-41.6395	-19.6938
	Level6 Level5	-34.6667	3.2272	15.1915	2.86446e-08	0.05	1	-45.6395	-23.6938
	Level7 Level1	22.6667	3.2272	9.93292	1.7119e-07	0.05	1	11.6938	33.6395
	Level7 Level2	-20	3.2272	8.76434	3.68249e-06	0.05	1	-30.9728	-9.02718
	Level7 Level3	-23.3333	3.2272	10.2251	8.70793e-08	0.05	1	-34.3062	-12.3605
	Level7 Level4	-18.6667	3.2272	8.18005	1.74239e-05	0.05	1	-29.6395	-7.69384
	Level7 Level5	-22.6667	3.2272	9.93292	1.7119e-07	0.05	1	-33.6395	-11.6938
	Level7 Level6	12	3.2272	5.2586	0.02061	0.05	1	1.02718	22.9728
	Level8 Level1	22.6667	3.2272	9.93292	1.7119e-07	0.05	1	11.6938	33.6395
	Level8 Level2	-20	3.2272	8.76434	3.68249e-06	0.05	1	-30.9728	-9.02718
	Level8 Level3	-23.3333	3.2272	10.2251	8.70793e-08	0.05	1	-34.3062	-12.3605
	Level8 Level4	-18.6667	3.2272	8.18005	1.74239e-05	0.05	1	-29.6395	-7.69384
	Level8 Level5	-22.6667	3.2272	9.93292	1.7119e-07	0.05	1	-33.6395	-11.6938
	Level8 Level6	12	3.2272	5.2586	0.02061	0.05	1	1.02718	22.9728
	Level8 Level7	0	3.2272	0	1	0.05	0	-10.9728	10.9728
	Level9 Level1	68	3.2272	29.7988	0	0.05	1	57.0272	78.9728
	Level9 Level2	25.3333	3.2272	11.1015	5.6049e-08	0.05	1	14.3605	36.3062
	Level9 Level3	22	3.2272	9.64077	3.55772e-07	0.05	1	11.0272	32.9728
	Level9 Level4	26.6667	3.2272	11.6858	4.81056e-08	0.05	1	15.6938	37.6395
	Level9 Level5	22.6667	3.2272	9.93292	1.7119e-07	0.05	1	11.6938	33.6395
	Level9 Level6	57.3333	3.2272	25.1244	1.97738e-08	0.05	1	46.3605	68.3062
	Level9 Level7	45.3333	3.2272	19.8658	1.50849e-08	0.05	1	34.3605	56.3062
	Level9 Level8	45.3333	3.2272	19.8658	1.50849e-08	0.05	1	34.3605	56.3062
	Level10 Level1	4.66667	3.2272	2.04501	0.94889	0.05	0	-6.30616	15.6395
	Level10 Level2	-38	3.2272	16.6522	0	0.05	1	-48.9728	-27.0272
	Level10 Level3	-41.3333	3.2272	18.113	1.28004e-08	0.05	1	-52.3062	-30.3605
	Level10 Level4	-36.6667	3.2272	16.068	2.44531e-08	0.05	1	-47.6395	-25.6938
	Level10 Level5	-40.6667	3.2272	17.8208	1.23851e-08	0.05	1	-51.6395	-29.6938
	Level10 Level6	-6	3.2272	2.6293	0.77852	0.05	0	-16.9728	4.97282
	Level10 Level7	-18	3.2272	7.88791	3.77059e-05	0.05	1	-28.9728	-7.02718
	Level10 Level8	-18	3.2272	7.88791	3.77059e-05	0.05	1	-28.9728	-7.02718
	Level10 Level9	-63.3333	3.2272	27.7537	0	0.05	1	-74.3062	-52.3605
	Level11 Level1	44.6667	3.2272	19.5737	1.47291e-08	0.05	1	33.6938	55.6395
	Level11 Level2	2	3.2272	0.87643	0.99997	0.05	0	-8.97282	12.9728
	Level11 Level3	-1.33333	3.2272	0.58429	1	0.05	0	-12.3062	9.63949
	Level11 Level4	3.33333	3.2272	1.46072	0.99623	0.05	0	-7.63949	14.3062
	Level11 Level5	-0.66667	3.2272	0.29214	1	0.05	0	-11.6395	10.3062
	Level11 Level6	34	3.2272	14.8994	3.00739e-08	0.05	1	23.0272	44.9728
	Level11 Level7	22	3.2272	9.64077	3.55772e-07	0.05	1	11.0272	32.9728
	Level11 Level8	22	3.2272	9.64077	3.55772e-07	0.05	1	11.0272	32.9728
	Level11 Level9	-23.3333	3.2272	10.2251	8.70793e-08	0.05	1	-34.3062	-12.3605
	Level11 Level10	40	3.2272	17.5287	1.19602e-08	0.05	1	29.0272	50.9728
	Level12 Level1	40	3.2272	17.5287	1.19602e-08	0.05	1	29.0272	50.9728
	Level12 Level2	-2.66667	3.2272	1.16858	0.9995	0.05	0	-13.6395	8.30616
	Level12 Level3	-6	3.2272	2.6293	0.77852	0.05	0	-16.9728	4.97282
	Level12 Level4	-1.33333	3.2272	0.58429	1	0.05	0	-12.3062	9.63949
	Level12 Level5	-5.33333	3.2272	2.33716	0.88172	0.05	0	-16.3062	5.63949
	Level12 Level6	29.3333	3.2272	12.8544	4.04391e-08	0.05	1	18.3605	40.3062
	Level12 Level7	17.3333	3.2272	7.59576	8.08999e-05	0.05	1	6.36051	28.3062
	Level12 Level8	17.3333	3.2272	7.59576	8.08999e-05	0.05	1	6.36051	28.3062
	Level12 Level9	-28	3.2272	12.2701	4.39517e-08	0.05	1	-38.9728	-17.0272
	Level12 Level10	35.3333	3.2272	15.4837	2.72317e-08	0.05	1	24.3605	46.3062
	Level12 Level11	-4.66667	3.2272	2.04501	0.94889	0.05	0	-15.6395	6.30616
b.	ANOVA	DF	Sum of Squares	Mean Square	F Value	Prob>F					Level 1- UAS-IP3R IR/+ (PDD)
	Model	11	221.371	20.1247	0.73875	0.69723					Level 2-UAS-IP3R IR/+ (PDD + M)
	Error	58	1580	27.2414							Level 3-UAS-IP3R IR/+ (PDD + F)
	Total	69	1801.37								Level 4-UAS-IP3R IR/+ (PDD + T)
											Level 5-UAS-IP3R IR/+ (PDD + Y)
	Tukey Test	MeanDiff	SEM	q Value	Prob	Alpha	Sig	LCL	UCL		Level 6-UAS-IP3R IR/+ (PDD + W)
	Level2 Level1	-1.66667	3.36906	0.69961	1	0.1	0	-12.2096	8.87622		Level 7-UAS-IP3R IR/+ (PDD + K)
	Level3 Level1	-0.33333	3.36906	0.13992	1	0.1	0	-10.8762	10.2096		Level 8-UAS-IP3R IR/+ (PDD + H)
	Level3 Level2	1.33333	3.01338	0.62575	1	0.1	0	-8.09652	10.7632		Level 9-UAS-IP3R IR/+ (PDD + R)
	Level4 Level1	-4.33333	3.36906	1.81898	0.97773	0.1	0	-14.8762	6.20956		Level 10-UAS-IP3R IR/+ (PDD + L)
	Level4 Level2	-2.66667	3.01338	1.2515	0.99904	0.1	0	-12.0965	6.76318		Level 11-UAS-IP3R IR/+ (PDD + C)
	Level4 Level3	-4	3.01338	1.87725	0.97189	0.1	0	-13.4299	5.42985		Level 12-UAS-IP3R IR/+ (PDD + V)
	Level5 Level1	-3.66667	3.36906	1.53914	0.99408	0.1	0	-14.2096	6.87622
	Level5 Level2	-2	3.01338	0.93862	0.99994	0.1	0	-11.4299	7.42985
	Level5 Level3	-3.33333	3.01338	1.56437	0.99323	0.1	0	-12.7632	6.09652
	Level5 Level4	0.66667	3.01338	0.31287	1	0.1	0	-8.76318	10.0965
	Level6 Level1	-5.66667	3.36906	2.37867	0.86894	0.1	0	-16.2096	4.87622
	Level6 Level2	-4	3.01338	1.87725	0.97189	0.1	0	-13.4299	5.42985
	Level6 Level3	-5.33333	3.01338	2.50299	0.82704	0.1	0	-14.7632	4.09652
	Level6 Level4	-1.33333	3.01338	0.62575	1	0.1	0	-10.7632	8.09652
	Level6 Level5	-2	3.01338	0.93862	0.99994	0.1	0	-11.4299	7.42985
	Level7 Level1	-4.33333	3.36906	1.81898	0.97773	0.1	0	-14.8762	6.20956
	Level7 Level2	-2.66667	3.01338	1.2515	0.99904	0.1	0	-12.0965	6.76318
	Level7 Level3	-4	3.01338	1.87725	0.97189	0.1	0	-13.4299	5.42985
	Level7 Level4	1.42109e-14	3.01338	6.66932e-15	1	0.1	0	-9.42985	9.42985
	Level7 Level5	-0.66667	3.01338	0.31287	1	0.1	0	-10.0965	8.76318
	Level7 Level6	1.33333	3.01338	0.62575	1	0.1	0	-8.09652	10.7632
	Level8 Level1	-2.33333	3.36906	0.97945	0.99991	0.1	0	-12.8762	8.20956
	Level8 Level2	-0.66667	3.01338	0.31287	1	0.1	0	-10.0965	8.76318
	Level8 Level3	-2	3.01338	0.93862	0.99994	0.1	0	-11.4299	7.42985
	Level8 Level4	2	3.01338	0.93862	0.99994	0.1	0	-7.42985	11.4299
	Level8 Level5	1.33333	3.01338	0.62575	1	0.1	0	-8.09652	10.7632
	Level8 Level6	3.33333	3.01338	1.56437	0.99323	0.1	0	-6.09652	12.7632
	Level8 Level7	2	3.01338	0.93862	0.99994	0.1	0	-7.42985	11.4299
	Level9 Level1	-5.66667	3.36906	2.37867	0.86894	0.1	0	-16.2096	4.87622
	Level9 Level2	-4	3.01338	1.87725	0.97189	0.1	0	-13.4299	5.42985
	Level9 Level3	-5.33333	3.01338	2.50299	0.82704	0.1	0	-14.7632	4.09652
	Level9 Level4	-1.33333	3.01338	0.62575	1	0.1	0	-10.7632	8.09652
	Level9 Level5	-2	3.01338	0.93862	0.99994	0.1	0	-11.4299	7.42985
	Level9 Level6	1.42109e-14	3.01338	6.66932e-15	1	0.1	0	-9.42985	9.42985
	Level9 Level7	-1.33333	3.01338	0.62575	1	0.1	0	-10.7632	8.09652
	Level9 Level8	-3.33333	3.01338	1.56437	0.99323	0.1	0	-12.7632	6.09652
	Level10 Level1	-4.33333	3.36906	1.81898	0.97773	0.1	0	-14.8762	6.20956
	Level10 Level2	-2.66667	3.01338	1.2515	0.99904	0.1	0	-12.0965	6.76318
	Level10 Level3	-4	3.01338	1.87725	0.97189	0.1	0	-13.4299	5.42985
	Level10 Level4	0	3.01338	0	1	0.1	0	-9.42985	9.42985
	Level10 Level5	-0.66667	3.01338	0.31287	1	0.1	0	-10.0965	8.76318
	Level10 Level6	1.33333	3.01338	0.62575	1	0.1	0	-8.09652	10.7632
	Level10 Level7	-1.42109e-14	3.01338	6.66932e-15	1	0.1	0	-9.42985	9.42985
	Level10 Level8	-2	3.01338	0.93862	0.99994	0.1	0	-11.4299	7.42985
	Level10 Level9	1.33333	3.01338	0.62575	1	0.1	0	-8.09652	10.7632
	Level11 Level1	-3	3.36906	1.25929	0.99898	0.1	0	-13.5429	7.54289
	Level11 Level2	-1.33333	3.01338	0.62575	1	0.1	0	-10.7632	8.09652
	Level11 Level3	-2.66667	3.01338	1.2515	0.99904	0.1	0	-12.0965	6.76318
	Level11 Level4	1.33333	3.01338	0.62575	1	0.1	0	-8.09652	10.7632
	Level11 Level5	0.66667	3.01338	0.31287	1	0.1	0	-8.76318	10.0965
	Level11 Level6	2.66667	3.01338	1.2515	0.99904	0.1	0	-6.76318	12.0965
	Level11 Level7	1.33333	3.01338	0.62575	1	0.1	0	-8.09652	10.7632
	Level11 Level8	-0.66667	3.01338	0.31287	1	0.1	0	-10.0965	8.76318
	Level11 Level9	2.66667	3.01338	1.2515	0.99904	0.1	0	-6.76318	12.0965
	Level11 Level10	1.33333	3.01338	0.62575	1	0.1	0	-8.09652	10.7632
	Level12 Level1	-5	3.36906	2.09882	0.93903	0.1	0	-15.5429	5.54289
	Level12 Level2	-3.33333	3.01338	1.56437	0.99323	0.1	0	-12.7632	6.09652
	Level12 Level3	-4.66667	3.01338	2.19012	0.91988	0.1	0	-14.0965	4.76318
	Level12 Level4	-0.66667	3.01338	0.31287	1	0.1	0	-10.0965	8.76318
	Level12 Level5	-1.33333	3.01338	0.62575	1	0.1	0	-10.7632	8.09652
	Level12 Level6	0.66667	3.01338	0.31287	1	0.1	0	-8.76318	10.0965
	Level12 Level7	-0.66667	3.01338	0.31287	1	0.1	0	-10.0965	8.76318
	Level12 Level8	-2.66667	3.01338	1.2515	0.99904	0.1	0	-12.0965	6.76318
	Level12 Level9	0.66667	3.01338	0.31287	1	0.1	0	-8.76318	10.0965
	Level12 Level10	-0.66667	3.01338	0.31287	1	0.1	0	-10.0965	8.76318
	Level12 Level11	-2	3.01338	0.93862	0.99994	0.1	0	-11.4299	7.42985
e.	ANOVA	DF	Sum of Squares	Mean Square	F Value	Prob>F					Level 1- VGN 6341-GAL4>UAS-GCaMP6m (Mock withdrawal)
	Model	3	4816.12	1605.37	16.0059	8.40757e-05					Level 2- VGN 6341-GAL4>UAS-GCaMP6m (Arginine withdrawal)
	Error	14	1404.19	100.299							Level 3- VGN 6341-GAL4>UAS-GCaMP6m (Withdrawal of mixture minus arginine)
	Total	17	6220.31								Level 4- VGN 6341-GAL4>UAS-GCaMP6m (Withdrawal of NEAA)
	Tukeys Test	MeanDiff	SEM	q Value	Prob	Alpha	Sig	LCL	UCL
	Level2 Level1	16.2121	6.334	3.61972	0.09321	0.05	0	-2.19793	34.6221
	Level3 Level1	-26.9063	6.334	6.00746	0.00399	0.05	1	-45.3163	-8.4963
	Level3 Level2	-43.1183	6.334	9.62718	4.48363e-05	0.05	1	-61.5283	-24.7084
	Level4 Level1	1.83303	7.31388	0.35443	0.99422	0.05	0	-19.425	23.091
	Level4 Level2	-14.379	7.31388	2.78033	0.24654	0.05	0	-35.6371	6.879
	Level4 Level3	28.7393	7.31388	5.55704	0.00729	0.05	1	7.48129	49.9973
											Level 1- VGN 6341-GAL4>UAS-GCaMP6m (Mock withdrawal)
f.	ANOVA	DF	Sum of Squares	Mean Square	F Value	Prob>F					Level 2- VGN 6341-GAL4>UAS-GCaMP6m (Arginine withdrawal)
	Model	3	10284500	3428150	14.0076	4.47925e-08					Level 3- VGN 6341-GAL4>UAS-GCaMP6m (Withdrawal of mixture minus arginine)
	Error	146	35731200	244734							Level 4- VGN 6341-GAL4>UAS-GCaMP6m (Withdrawal of NEAA)
	Total	149	46015700
	Tukeys Test	MeanDiff	SEM	q Value	Prob	Alpha	Sig	LCL	UCL
	Level2 Level1	-77.3113	138.86	0.78737	0.94457	0.05	0	-438.19	283.567
	Level3 Level1	-593.222	104.898	7.99771	4.67646e-07	0.05	1	-865.838	-320.607
	Level3 Level2	-515.911	118.195	6.17293	0.000139626	0.05	1	-823.084	-208.738
	Level4 Level1	-332.123	168.974	2.77967	0.20588	0.05	0	-771.265	107.019
	Level4 Level2	-254.812	177.535	2.02978	0.47951	0.05	0	-716.203	206.579
	Level4 Level3	261.099	152.448	2.42215	0.3208	0.05	0	-135.092	657.291

## Sheet: Figure4
b.	0.00525		Two-tailed Student's t-test								dimm-LexA>LexAop-ANF::GFP vs dimm-LexA>LexAop-ANF::GFP;VGN6341-GAL4>UAS-eNpHR2 (mNSC)
c.	0.13651		Two-tailed Student's t-test								dimm-LexA>LexAop-ANF::GFP vs dimm-LexA>LexAop-ANF::GFP;VGN6341-GAL4>UAS-eNpHR2 (non- mNSC)
d.	ANOVA	DF	Sum of Squares	Mean Square	F Value	P Value
	Genotype	1	7436.7	7436.7	35.4811	6.52158e-06
	Media	1	9908.2	9908.2	47.2728	8.53364e-07
	Interaction	1	6601.14	6601.14	31.4946	1.43501e-05
	Model	3	25841	8613.68	41.0965	5.73391e-09
	Error	21	4401.52	209.596
	Corrected Total	24	30242.6
	Tukeys Test
	Genotype	MeanDiff	SEM	q Value	Prob	Alpha	Sig	LCL	UCL
	Dilp2>UASShits CS>UASShits	-37.359	5.79562	9.11613	2.27166e-06	0.05	1	-49.4117	-25.3062
	Media	MeanDiff	SEM	q Value	Prob	Alpha	Sig	LCL	UCL
	PDD ND	-42.4872	5.79562	10.3675	4.1409e-07	0.05	1	-54.5399	-30.4344
f.	0.02858		Two-tailed Student's t-test								dimm-LexA-LexaopANF::GFP (data from mNSC) vs PTTH-GAL4>UAS-ANF::GFP( from PTTH cells)

## Sheet: Figure5
b.	ANOVA										Level 1- VGN 6341-GAL4>UAS-GCaMP6m
		DF	Sum of Squares	Mean Square	F Value	Prob>F					Level 2- VGN 6341-GAL4>UAS-GCaMP6m,UAS-AstA R2 IR
	Model	3	22126.2	7375.41	212.26	8.77076e-15					Level 3- VGN 6341-GAL4>UAS-GCaMP6m,UAS-FMRFaR IR
	Error	19	660.194	34.747							Level 4- VGN 6341-GAL4>UAS-GCaMP6m,UAS-CCHa2 R IR
	Total	22	22786.4
	Tukeys
		MeanDiff	SEM	q Value	Prob	Alpha	Sig	LCL	UCL
	Level2 Level1	35.1094	3.18348	15.5968	0	0.05	1	26.1579	44.0609
	Level3 Level1	-39.8368	3.36047	16.7648	0	0.05	1	-49.2859	-30.3876
	Level3 Level2	-74.9462	3.56939	29.6941	0	0.05	1	-84.9827	-64.9096
	Level4 Level1	-44.7678	3.60973	17.5391	0	0.05	1	-54.9178	-34.6178
	Level4 Level2	-79.8772	3.80499	29.6883	0	0.05	1	-90.5763	-69.1782
	Level4 Level3	-4.93109	3.95426	1.76357	0.60593	0.05	0	-16.0498	6.18768
c.	ANOVA										Level 1- VGN 6341-GAL4>UAS-GCaMP6m
		DF	Sum of Squares	Mean Square	F Value	Prob>F					Level 2- VGN 6341-GAL4>UAS-GCaMP6m,UAS-AstA R2 IR
	Model	3	524345000	174782000	9.32574	7.75988e-06					Level 3- VGN 6341-GAL4>UAS-GCaMP6m,UAS-FMRFaR IR
	Error	225	4216920000	18741900							Level 4- VGN 6341-GAL4>UAS-GCaMP6m,UAS-CCHa2 R IR
	Total	228	4741260000
	Tukey Test
		MeanDiff	SEM	q Value	Prob	Alpha	Sig	LCL	UCL
	Level2 Level1	2974.36	586.641	7.17028	4.92214e-06	0.05	1	1455.94	4492.79
	Level3 Level1	-201.723	1587.31	0.17973	0.99926	0.05	0	-4310.2	3906.76
	Level3 Level2	-3176.09	1584.32	2.83507	0.18929	0.05	0	-7276.84	924.663
	Level4 Level1	-1097.3	2534.58	0.61226	0.97275	0.05	0	-7657.64	5463.04
	Level4 Level2	-4071.66	2532.71	2.27353	0.37638	0.05	0	-10627.2	2483.84
	Level4 Level3	-895.577	2930.87	0.43214	0.99008	0.05	0	-8481.66	6690.5
e.	0.15686		Two-tailed Student's t-test								VGN 6341-GAL4>UAS-GCaMP6m ;dimm-LexA>LexAop-Shits (Initial phase 22°C vs 31°C)
f.	4.3035e-06		Two-tailed Student's t-test								VGN 6341-GAL4>UAS-GCaMP6m ;dimm-LexA>LexAop-Shits (Later phase 22°C vs 31°C)
g.	3.68626e-05		Two-tailed Student's t-test								UAS-CCHa2 IR vs cg-GAL4>UAS-CCHa2 IR
h.	0.35576		Two-tailed Student's t-test								UAS-Shits vs FMRFa-GAL4>UAS-Shits (Permissive Temperature)
	3.75071e-08		Two-tailed Student's t-test								UAS-Shits vs FMRFa-GAL4>UAS-Shits (Restricted Temperature)
l.	3.41228e-05										Mock vs Addition of FMRFa
			Two-tailed
m.	0.000527221		Student's								Mock vs Addition of CCHa2
			t-test
n.	0.000535367										Mock vs Addition of AstA

## Sheet: Figure6
e.	0.021		Two-tailed Student's t-test								UAS-slif IR/+ and ppk-GAL4>UAS-slif IR
f.	ANOVA	DF	Sum of Squares	Mean Square	F Value	Prob>F					Level 1- UAS-slif IR/+(PDD)
	Model	2	19999.4	9999.71	390.614	3.33067e-16					Level 2-ppk-GAL4>UAS-slif IR (PDD)
	Error	19	486.4	25.6							Level 3-ppk-GAL4>UAS-slif IR (PDD + Arginine)
	Total	21	20485.8
	Tukey Test	MeanDiff	SEM	q Value	Prob	Alpha	Sig	LCL	UCL
	Level2 Level1	44.4	2.61279	24.0322	0	0.05	1	37.7625	51.0375
	Level3 Level1	70.4	2.61279	38.1051	0	0.05	1	63.7625	77.0375
	Level3 Level2	26	2.92119	12.5872	4.01929e-08	0.05	1	18.579	33.421
j.	0.000105775		Two-tailed Student's t-test								UAS-slif IR/+ and ppk-GAL4>UAS-slif IR
k.	1.60094e-05		Two-tailed Student's t-test								ppk-QF>QUAS-eNpHR3 (during inhibition vs post inhibition)

## Sheet: Figure7
f.	mAChR	0.5172
	STIM	0.7659
	Orai	0.3073	Two-tailed
	cac	0.019984	Student's
	Hk	0.0723	t-test
	eag	0.40207
i.	ANOVA	DF	Sum of Squares	Mean Square	F Value	Prob>F
	Model	2	0.54	0.27	24.3	0.000235608
	Error	9	0.1	0.01111
	Total	11	0.64
	Tukey test
		MeanDiff	SEM	q Value	Prob	Alpha	Sig	LCL	UCL
	Ctrl WT	0.45	0.07454	8.53815	0.00050719	0.05	1	0.2419	0.6581
	StimKD WT	0.45	0.07454	8.53815	0.00050719	0.05	1	0.2419	0.6581
	StimKD Ctrl	-5.55112e-17	0.07454	1.05325e-15	1	0.05	0	-0.2081	0.2081
k.	dStim	0.012
	mAChR	0.003
	NaCP60E	0.023	Two-tailed
			Student's
	Hk	0.04	t-test
	eag	0.04
	cac	0.077
	Ca-alpha1D	0.008

## Sheet: Figure8
b.		ANOVA
			DF	Sum of Squares	Mean Square	F Value	Prob>F					Level 1- VGN 6341-GAL4>UAS-jRCaMP1b
		Model	3	7.33085	2.44362	13.4494	3.43849e-07					Level 2-VGN 6341-GAL4>UAS-jRCaMP1b, itpr IR
		Error	80	14.5351	0.18169							Level 3-VGN 6341-GAL4>UAS-jRCaMP1b, dSTIM IR
		Total	83	21.866								Level 4-VGN 6341-GAL4>UAS-jRCaMP1b, dOrai IR
		Tukeys test
			MeanDiff	SEM	q Value	Prob	Alpha	Sig	LCL	UCL
		Level2 Level1	-0.70958	0.13633	7.36051	8.65205e-06	0.05	1	-1.0673	-0.35185
		Level3 Level1	-0.44783	0.13414	4.72138	0.00688	0.05	1	-0.79979	-0.09586
		Level3 Level2	0.26175	0.14416	2.56781	0.27361	0.05	0	-0.1165	0.64
		Level4 Level1	-0.69251	0.12201	8.02656	1.25275e-06	0.05	1	-1.01266	-0.37236
		Level4 Level2	0.01707	0.13295	0.18153	0.99924	0.05	0	-0.33178	0.36591
		Level4 Level3	-0.24468	0.1307	2.6476	0.24823	0.05	0	-0.58762	0.09825
d.		ANOVA										Level 1- VGN 6341-GAL4>UAS-GCaMP6m
			DF	Sum of Squares	Mean Square	F Value	Prob>F					Level 2-VGN 6341-GAL4>UAS-GCaMP6m, K+ Blocker
		Model	3	3526.15	1175.38	30.58	3.353e-08					Level 3-VGN 6341-GAL4>UAS-GCaMP6m, Ca2+ Blocker
		Error	23	884.036	38.4364							Level 4-VGN 6341-GAL4>UAS-GCaMP6m, Na+ Blocker
		Total	26	4410.19
		Tukeys Test
			MeanDiff	SEM	q Value	Prob	Alpha	Sig	LCL	UCL
		Level2 Level1	-18.3544	3.20865	8.08971	4.44697e-05	0.05	1	-27.2338	-9.4751
		Level3 Level1	-31.4525	3.34822	13.2848	2.19944e-07	0.05	1	-40.7181	-22.1869
		Level3 Level2	-13.0981	3.4492	5.37037	0.00479	0.05	1	-22.6431	-3.5531
		Level4 Level1	-12.8602	3.34822	5.43185	0.00432	0.05	1	-22.1258	-3.59463
		Level4 Level2	5.49423	3.4492	2.2527	0.4021	0.05	0	-4.05075	15.0392
		Level4 Level3	18.5923	3.5794	7.34578	0.000159194	0.05	1	8.68702	28.4976
e.		ANOVA
			DF	Sum of Squares	Mean Square	F Value	Prob>F
		Model	3	108744	36247.9	0.28392	0.83699
		Error	243	31023200	127668
		Total	246	31132000
f.		ANOVA										Level 1- VGN 6341-GAL4>UAS-GCaMP6m
			DF	Sum of Squares	Mean Square	F Value	Prob>F					Level 2-VGN 6341-GAL4>UAS-GCaMP6m, K+ Blocker
		Model	3	8224070	2741360	5.04391	0.00208					Level 3-VGN 6341-GAL4>UAS-GCaMP6m, Ca2+ Blocker
		Error	243	132070000	543498							Level 4-VGN 6341-GAL4>UAS-GCaMP6m, Na+ Blocker
		Total	246	140294000
		Tukeys test
			MeanDiff	SEM	q Value	Prob	Alpha	Sig	LCL	UCL
		Level2 Level1	-370.07	120.816	4.33184	0.01294	0.05	1	-682.61	-57.5303
		Level3 Level1	-368.975	150.858	3.45895	0.07137	0.05	0	-759.229	21.279
		Level3 Level2	1.09466	164.021	0.00944	1	0.05	0	-423.211	425.4
		Level4 Level1	-369.396	123.656	4.22468	0.01629	0.05	1	-689.281	-49.5118
		Level4 Level2	0.67362	139.411	0.00683	1	0.05	0	-359.968	361.316
		Level4 Level3	-0.42104	166.123	0.00358	1	0.05	0	-430.165	429.323
g.		ANOVA										Level 1- VGN 6341-GAL4/+
			DF	Sum of Squares	Mean Square	F Value	Prob>F					Level 2-VGN 6341-GAL4>UAS- K+ Blocker
		Model	3	14291	4763.67	120.092	3.24383e-09					Level 3-VGN 6341-GAL4>UAS-Ca2+ Blocker
		Error	12	476	39.6667							Level 4-VGN 6341-GAL4>UAS- Na+ Blocker
		Total	15	14767
		Tukeys test
			MeanDiff	SEM	q Value	Prob	Alpha	Sig	LCL	UCL
		Level2 Level1	-77	4.45346	24.4516	0	0.05	1	-90.2218	-63.7782
		Level3 Level1	-61	4.45346	19.3708	0	0.05	1	-74.2218	-47.7782
		Level3 Level2	16	4.45346	5.08086	0.01683	0.05	1	2.77819	29.2218
		Level4 Level1	-65	4.45346	20.641	0	0.05	1	-78.2218	-51.7782
		Level4 Level2	12	4.45346	3.81064	0.07989	0.05	0	-1.22181	25.2218
		Level4 Level3	-4	4.45346	1.27021	0.80602	0.05	0	-17.2218	9.22181
